# Supplementary material for: Shade compromises the photosynthetic efficiency of NADP-ME less than that of PEP-CK and NAD-ME C4 grasses
Source: PubMed Central journal article supplement (PMC5972597; doi:10.1093/jxb/ery129), 2018-04-05
Supplement: ery129_suppl_appendix_s1.pdf [file ery129_suppl_appendix_s1.pdf]

## Appendix

### Leakiness calculations at low light

The light limited C<sub>4</sub> photosynthesis model (von Caemmerer, 2000) was deployed to derive electron transport flux ( $J_t$ ) as a function of photosynthetic rates ( $A$ ) as described by Ubierna et al. (2013) as bellow,

$$J_t = \frac{-II + \sqrt{II^2 - 4 \cdot III \cdot I}}{2 \cdot III} \quad (S1)$$

where

$$I = \left(1 + \frac{R_d}{A}\right) \cdot \left(R_m - g_{bs} \cdot c_m \cdot \frac{7 \cdot g_{bs} \cdot \Gamma^* \cdot O_m}{3}\right) + (R_d + A) \cdot \left(1 + \frac{7 \cdot \alpha \cdot \Gamma^*}{3 \cdot 0.047}\right) \quad (S2)$$

$$II = \frac{1-x}{3} \cdot \left[\frac{g_{bs}}{A} \cdot \left(c_m - \frac{R_m}{g_{bs}} - \Gamma^* \cdot O_m\right) - 1 - \frac{\alpha \cdot \Gamma^*}{0.047}\right] - \frac{x}{2} \cdot \left(1 + \frac{R_d}{A}\right) \quad (S3)$$

$$III = \frac{x-x^2}{6 \cdot A} \quad (S4)$$

Variable definitions and units are presented in Table 1. We used measured values for  $\alpha$  and  $\Gamma^*$  for biochemical subtypes of C<sub>4</sub> photosynthesis (Table 2, (Sharwood et al., 2016).

We calculate  $C_s$  (CO<sub>2</sub> mole fraction in the bundle-sheath,  $V_p$  (PEP carboxylation rate),  $V_c$  (Rubisco carboxylation rate) and  $V_o$  (Rubisco oxygenation rate) at low light using C<sub>4</sub> model (von Caemmerer, 2000)

$$C_s = \frac{(\gamma^* \cdot O_s) \cdot \left( \frac{7}{3} \cdot (A + R_d) + \frac{(1-x) \cdot J_t}{3} \right)}{\frac{(1-x) \cdot J_t}{3} - (A + R_d)} \quad (S5)$$

$$V_p = \frac{x \cdot J_t}{2} \quad (S6)$$

$$V_c = \frac{(1-x) \cdot J_t}{3 \cdot \left( 1 + \frac{7 \cdot \gamma^* \cdot O_s}{3 \cdot C_s} \right)} \quad (S7)$$

$$V_o = \frac{V_c - A - R_d}{0.5} \quad (S8)$$

The term  $\bar{b}_4$  and  $\bar{b}_3$  in Eqn 9 are defined as,

$$\bar{b}_3 = b_3 - \frac{eR_d}{V_c} - \frac{0.5 \cdot f \cdot V_o}{V_c} \quad (S9)$$

$$\bar{b}_4 = b_4 \left( 1 - \frac{V_p}{V_h} \right) + (e_s + h) \cdot \frac{V_p}{V_h} - \frac{eR_m}{V_p} \quad (S10)$$

and we assumed that CA is saturating and  $V_p/V_h$  is approx. 0, hence:

$$\bar{b}_4 = b_4 - \frac{eR_m}{V_p} \quad (S11)$$

Note that equations 7 and 8 are rearranged forms of equations S9 and S10 from (von Caemmerer et al., 2014).
