# Supplementary material for: Shade compromises the photosynthetic efficiency of NADP-ME less than that of PEP-CK and NAD-ME C4 grasses
Source: PubMed Central journal article supplement (PMC5972597; doi:10.1093/jxb/ery129), 2018-04-05
Supplement: ery129_suppl_supplementary_figures_s1-s4.pdf [file ery129_suppl_supplementary_figures_s1-s4.pdf]

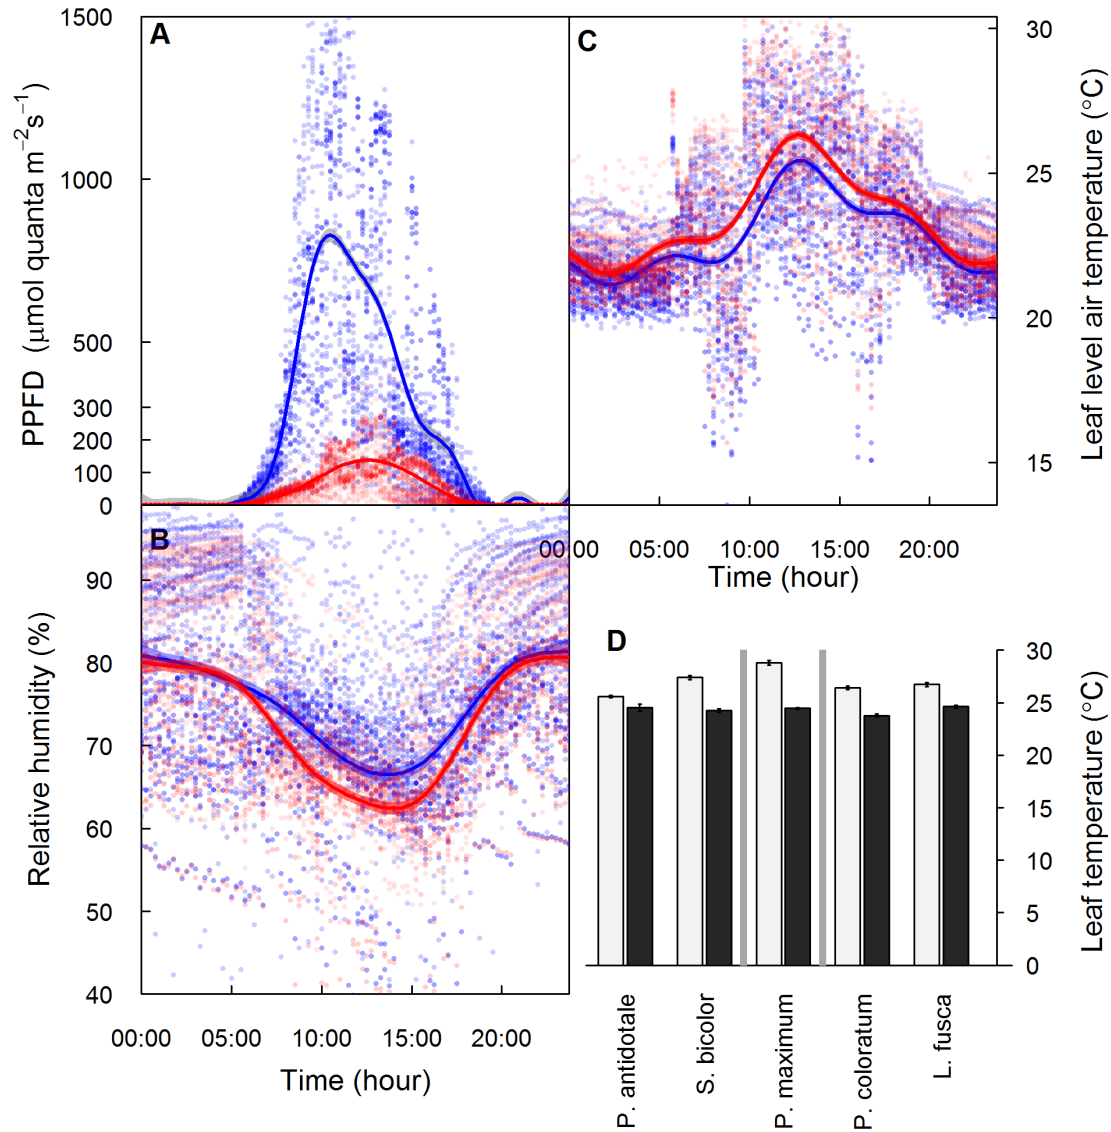

**Fig. S1. Glasshouse growth conditions.**

Glasshouse conditions during the experimental growth period; photosynthetic photon flux density, (A) PPFD, (B) relative humidity, and (C) and leaf-level air temperature. The solid lines represent the growth averages of data points. Average conditions for each treatment is also shown. (D) Instantaneous leaf temperature taken with an infrared camera (AGRI-THERM II<sup>TM</sup>) of some grasses are shown during a typical sunny day for control (white columns) and shade (black columns) plants.

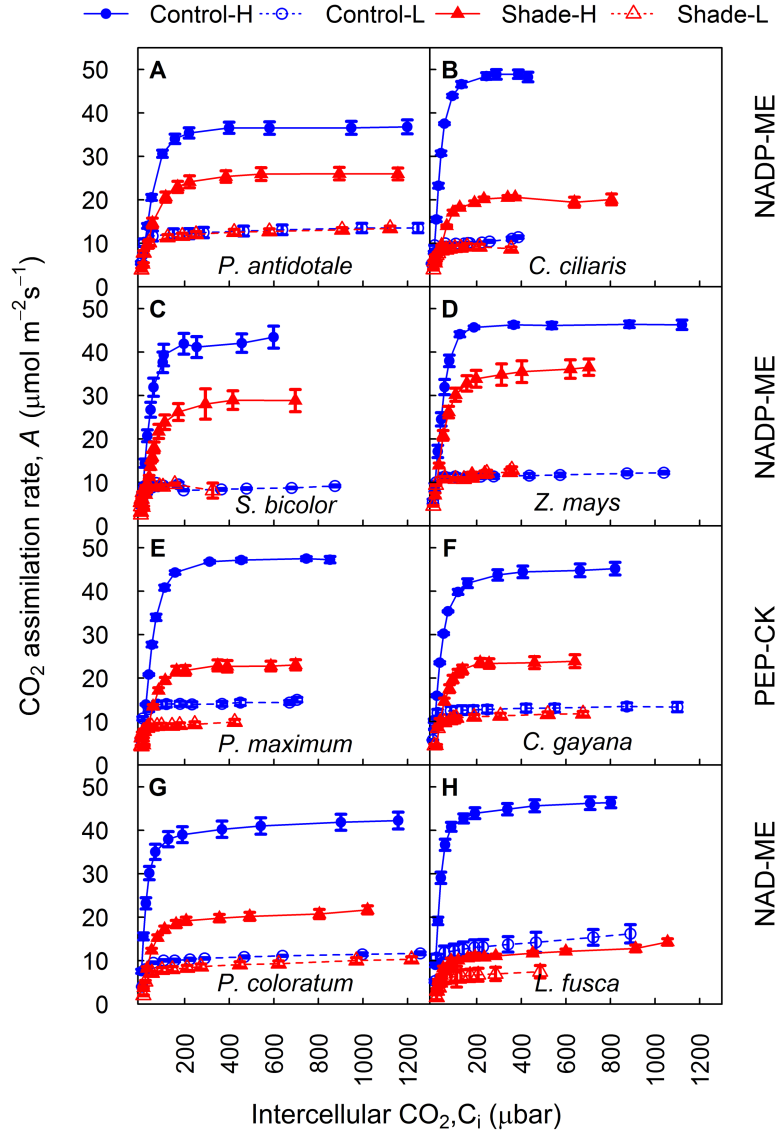

**Fig. S2. Photosynthetic CO<sub>2</sub> response curves (A-C<sub>i</sub>) of C<sub>4</sub> grasses.**

Responses of CO<sub>2</sub> assimilation rate to increasing intercellular [CO<sub>2</sub>], C<sub>i</sub> were measured at low light, 250 μmol quanta m<sup>-2</sup> s<sup>-1</sup> (dashed lines and open symbols) and high light, 2000 μmol quanta m<sup>-2</sup> s<sup>-1</sup> (straight lines and closed symbols) in (A-D) C<sub>4</sub>-NADP-ME, (E-F) C<sub>4</sub>-PEP-CK and (G-H) C<sub>4</sub>-NAD-ME grasses grown in control (full sunlight; blue and circles) or shade (16% of natural sunlight; red and triangles) environments. Values are means of 3-4 replicates ± SE.

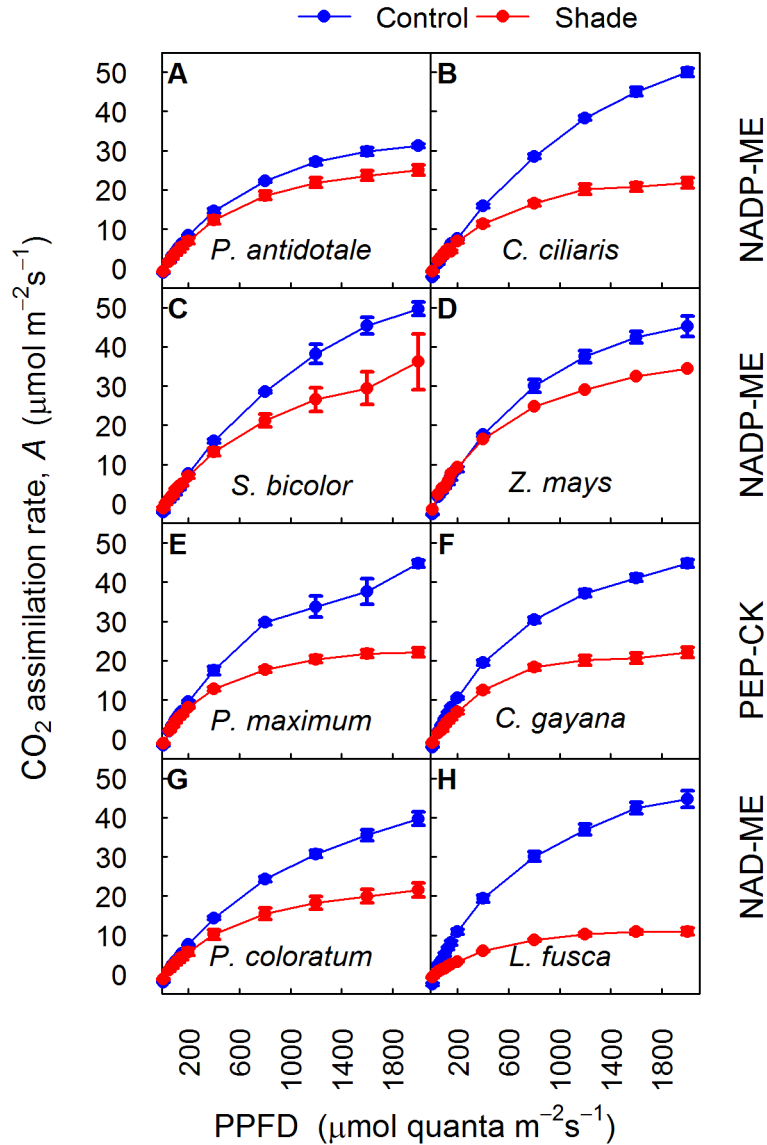

**Fig. S3. Photosynthetic light response curves for  $C_4$  grasses.**

Responses of  $CO_2$  assimilation rate ( $A$ ) to increasing light (PPFD) were measured at saturating  $CO_2$  ( $C_a = 650 \mu\text{L L}^{-1}$ ) in (A-D)  $C_4$ -NADP-ME, (E-F)  $C_4$ -PEP-CK and (G-H)  $C_4$ -NAD-ME grasses grown in control (full sunlight; blue) or shade (16% of natural sunlight; red) environments. Values are means of 3-4 replicates  $\pm$  SE

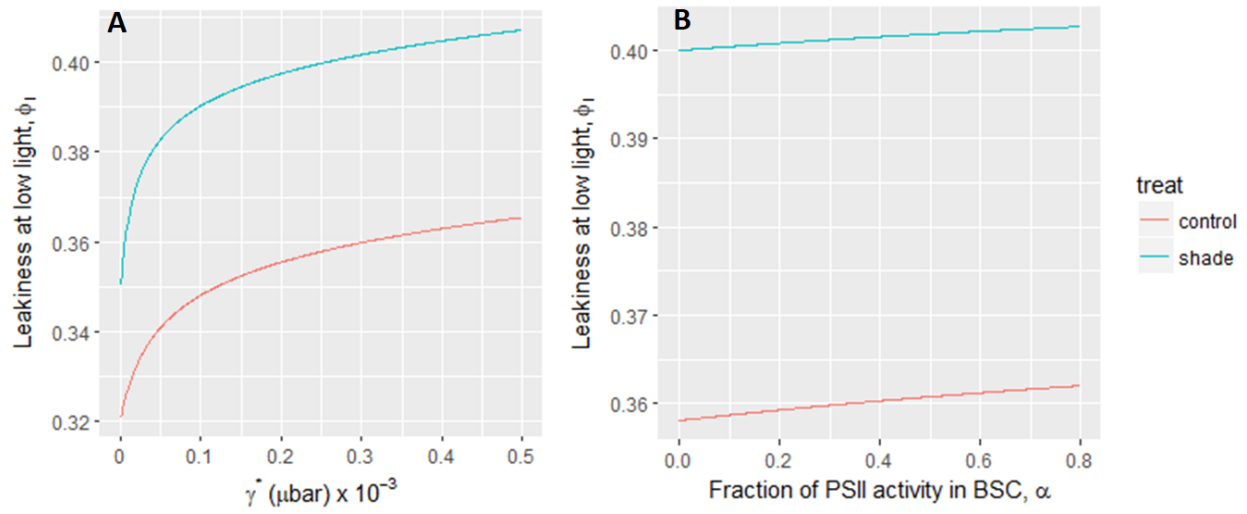

**Fig. S4.** Sensitivity of leakiness at low light to the (A) half of Rubisco specificity,  $\gamma^*$  and (B) fraction of PSII in BSC,  $\alpha$ , in *Z. mays* at low light ( $250 \mu\text{mol quanta m}^{-2}\text{s}^{-2}$ ). The modelled line is solution of equation 9 for the range of  $\gamma^*$  and  $\alpha$  values shown on x-axis.
