# Supplementary material for: Shade compromises the photosynthetic efficiency of NADP-ME less than that of PEP-CK and NAD-ME C4 grasses
Source: PubMed Central journal article supplement (PMC5972597; doi:10.1093/jxb/ery129), 2018-04-05
Supplement: ery129_suppl_supplementary_tables_s1-s5.pdf [file ery129_suppl_supplementary_tables_s1-s5.pdf]

**Table S1. Summary of plant growth parameters.**

Growth parameters of eight C<sub>4</sub> grasses grown in control (full sunlight) or shade (16% of natural sunlight) environments. Values are means  $\pm$  SE ( $n = 3-4$ ). The ranking (from lowest = a) of subtypes within each single row using multiple-comparison Tukey's *post hoc* test. Values followed by the same letter are not significantly different at the 5% level. Significant percent changes are shown in bold ( $p < 0.05$ ).

| Parameter                                                   | Treatment | Subtype          |                  |                   | C <sub>4</sub>  |
|-------------------------------------------------------------|-----------|------------------|------------------|-------------------|-----------------|
|                                                             |           | NADP-ME          | PEP-CK           | NAD-ME            |                 |
| Total DM<br>(g plant <sup>-1</sup> )                        | Control   | 54.3 $\pm$ 2.7ab | 82.1 $\pm$ 3.7b  | 35.1 $\pm$ 5.9a   | 57.2 $\pm$ 3.8  |
|                                                             | Shade     | 10.2 $\pm$ 2.2a  | 6.5 $\pm$ 0.7a   | 1.6 $\pm$ 0.5a    | 7.1 $\pm$ 1.3   |
|                                                             | % change  | <b>-81</b>       | <b>-92</b>       | <b>-95</b>        | <b>-88</b>      |
| Total leaf<br>area<br>(m <sup>2</sup> plant <sup>-1</sup> ) | Control   | 0.35 $\pm$ 0.03a | 0.56 $\pm$ 0.07a | 0.36 $\pm$ 0.08a  | 0.41 $\pm$ 0.03 |
|                                                             | Shade     | 0.16 $\pm$ 0.04a | 0.11 $\pm$ 0.01a | 0.03 $\pm$ 0.01a  | 0.12 $\pm$ 0.02 |
|                                                             | % change  | <b>-53</b>       | <b>-81</b>       | <b>-92</b>        | <b>0.29</b>     |
| Root/shoot<br>DM                                            | Control   | 0.42 $\pm$ 0.04a | 0.32 $\pm$ 0.02a | 0.37 $\pm$ 0.06a  | 0.38 $\pm$ 0.03 |
|                                                             | Shade     | 0.2 $\pm$ 0.01b  | 0.12 $\pm$ 0a    | 0.19 $\pm$ 0.02ab | 0.17 $\pm$ 0.01 |
|                                                             | % change  | <b>-53</b>       | <b>-62</b>       | <b>-49</b>        | <b>-54</b>      |
| LMA(g m <sup>-2</sup> )                                     | Control   | 41 $\pm$ 3a      | 34 $\pm$ 1a      | 37 $\pm$ 2a       | 38 $\pm$ 2      |
|                                                             | Shade     | 25 $\pm$ 2a      | 27 $\pm$ 2a      | 22 $\pm$ 1a       | 25 $\pm$ 1      |
|                                                             | % change  | <b>-39</b>       | <b>-20</b>       | <b>-39</b>        | <b>-35</b>      |
| Leaf N <sub>mass</sub><br>(mg g <sup>-1</sup> )             | Control   | 38 $\pm$ 1a      | 43 $\pm$ 1ab     | 48 $\pm$ 2b       | 42 $\pm$ 1      |
|                                                             | Shade     | 39 $\pm$ 2a      | 39 $\pm$ 2a      | 46 $\pm$ 1a       | 41 $\pm$ 1      |
|                                                             | % change  | 2                | -10              | -4                | -3              |
| Leaf N <sub>area</sub><br>(g m <sup>-2</sup> )              | Control   | 1.56 $\pm$ 0.13a | 1.46 $\pm$ 0.03a | 1.81 $\pm$ 0.08a  | 1.59 $\pm$ 0.07 |
|                                                             | Shade     | 0.94 $\pm$ 0.05a | 1.03 $\pm$ 0.05a | 1.02 $\pm$ 0.03a  | 0.99 $\pm$ 0.03 |
|                                                             | % change  | <b>-39</b>       | <b>-29</b>       | <b>-43</b>        | <b>-38</b>      |
| Plant NUE                                                   | Control   | 120 $\pm$ 5b     | 86 $\pm$ 7ab     | 72 $\pm$ 6a       | 99 $\pm$ 5      |
|                                                             | Shade     | 71 $\pm$ 4b      | 60 $\pm$ 1ab     | 43 $\pm$ 4a       | 61 $\pm$ 3      |
|                                                             | % change  | <b>-41</b>       | <b>-31</b>       | <b>-39</b>        | <b>-38</b>      |

**Table S2. Summary of gas exchange parameters.**

Gas exchange parameters of eight C<sub>4</sub> grasses grown in control (full sunlight) or shade (16% of natural sunlight) environments. Values are means  $\pm$  SE ( $n = 3-4$ ). The ranking (from lowest = a) of subtypes within each single row using multiple-comparison Tukey's *post hoc* test. Values followed by the same letter are not significantly different at the 5% level. Significant percent changes are shown in bold ( $p < 0.05$ ).

| Parameter                                                                                           | Treatment | Subtype          |                   |                  | C <sub>4</sub>  |
|-----------------------------------------------------------------------------------------------------|-----------|------------------|-------------------|------------------|-----------------|
|                                                                                                     |           | NADP-ME          | PEP-CK            | NAD-ME           |                 |
| CO <sub>2</sub> assimilation at HL,<br><i>A<sub>h</sub></i> ( $\mu\text{mol m}^{-2}\text{s}^{-1}$ ) | Control   | 42 $\pm$ 1a      | 41 $\pm$ 1a       | 42 $\pm$ 1a      | 42 $\pm$ 1      |
|                                                                                                     | Shade     | 25 $\pm$ 1b      | 22 $\pm$ 1ab      | 16 $\pm$ 1a      | 22 $\pm$ 1      |
|                                                                                                     | % change  | <b>-39</b>       | <b>-47</b>        | <b>-62</b>       | <b>-48</b>      |
| CO <sub>2</sub> assimilation at LL,<br><i>A<sub>l</sub></i> ( $\mu\text{mol m}^{-2}\text{s}^{-1}$ ) | Control   | 10 $\pm$ 1a      | 12 $\pm$ 1a       | 11 $\pm$ 0a      | 11 $\pm$ 0      |
|                                                                                                     | Shade     | 10 $\pm$ 0a      | 9 $\pm$ 0a        | 8 $\pm$ 1a       | 9 $\pm$ 0       |
|                                                                                                     | % change  | 0                | <b>-26</b>        | <b>-30</b>       | <b>-16</b>      |
| Conductance at HL,<br><i>g<sub>s h</sub></i> ( $\mu\text{mol m}^{-2}\text{s}^{-1}$ )                | Control   | 0.33 $\pm$ 0.02a | 0.31 $\pm$ 0.01a  | 0.33 $\pm$ 0.01a | 0.32 $\pm$ 0.01 |
|                                                                                                     | Shade     | 0.21 $\pm$ 0.02b | 0.17 $\pm$ 0.01ab | 0.13 $\pm$ 0.01a | 0.18 $\pm$ 0.01 |
|                                                                                                     | % change  | <b>-35</b>       | <b>-43</b>        | <b>-60</b>       | <b>-45</b>      |
| Conductance at LL,<br><i>g<sub>s l</sub></i> ( $\mu\text{mol m}^{-2}\text{s}^{-1}$ )                | Control   | 0.07 $\pm$ 0a    | 0.07 $\pm$ 0a     | 0.07 $\pm$ 0.01a | 0.07 $\pm$ 0    |
|                                                                                                     | Shade     | 0.07 $\pm$ 0.01a | 0.05 $\pm$ 0a     | 0.06 $\pm$ 0.01a | 0.06 $\pm$ 0    |
|                                                                                                     | % change  | 5                | <b>-28</b>        | -14              | -10             |
| Dark respiration,<br><i>R<sub>d</sub></i> ( $\mu\text{mol m}^{-2} \text{s}^{-1}$ )                  | Control   | 1.6 $\pm$ 0.1b   | 1.1 $\pm$ 0.1a    | 1.5 $\pm$ 0.1ab  | 1.4 $\pm$ 0.1   |
|                                                                                                     | Shade     | 0.9 $\pm$ 0.1a   | 1.2 $\pm$ 0.2a    | 1.1 $\pm$ 0.1a   | 1.1 $\pm$ 0.1   |
|                                                                                                     | % change  | <b>-42</b>       | 5                 | <b>-29</b>       | <b>-25</b>      |
| <i>R<sub>d</sub>/A<sub>GROWTH</sub></i> (x 100)                                                     | Control   | 3.7 $\pm$ 0.2b   | 2.7 $\pm$ 0.2a    | 3.5 $\pm$ 0.2ab  | 3.3 $\pm$ 0.1   |
|                                                                                                     | Shade     | 9.7 $\pm$ 0.6a   | 12.8 $\pm$ 1.9a   | 15.7 $\pm$ 2.2a  | 12.3 $\pm$ 1    |
|                                                                                                     | % change  | <b>158</b>       | <b>373</b>        | <b>341</b>       | <b>269</b>      |
| PWUE<br>( $\mu\text{mol CO}_2 \text{ mol}^{-1} \text{ H}_2\text{O}$ )                               | Control   | 130 $\pm$ 5a     | 137 $\pm$ 5a      | 132 $\pm$ 5a     | 133 $\pm$ 3     |
|                                                                                                     | Shade     | 121 $\pm$ 5a     | 128 $\pm$ 5a      | 124 $\pm$ 6a     | 124 $\pm$ 3     |
|                                                                                                     | % change  | -7               | -6                | -6               | -7              |
| PNUE<br>( $\mu\text{mol CO}_2 \text{ s}^{-1} \text{ g}^{-1} \text{ N}$ )                            | Control   | 29 $\pm$ 2a      | 29 $\pm$ 0a       | 23 $\pm$ 0a      | 28 $\pm$ 1      |
|                                                                                                     | Shade     | 29 $\pm$ 1b      | 23 $\pm$ 1ab      | 17 $\pm$ 2a      | 24 $\pm$ 1      |
|                                                                                                     | % change  | 0                | <b>-19</b>        | <b>-28</b>       | <b>-12</b>      |

**Table S3. Summary of carbon isotope discrimination parameters.**

Carbon isotope discrimination parameters for eight C<sub>4</sub> grasses grown at control (full sunlight) or shade (16% of natural sunlight) environments. Values are means  $\pm$  SE ( $n = 3-4$ ). The ranking (from lowest = a) of subtypes within each single row using multiple-comparison Tukey's *post hoc* test. Values followed by the same letter are not significantly different at the 5% level. Significant percent changes are shown in bold ( $p < 0.05$ ).

| Parameter                                                             | Treatment | Subtype          |                   |                  | C <sub>4</sub>  |
|-----------------------------------------------------------------------|-----------|------------------|-------------------|------------------|-----------------|
|                                                                       |           | NADP-ME          | PEP-CK            | NAD-ME           |                 |
| C <sub>i</sub> /C <sub>a</sub> at HL                                  | Control   | 0.32 $\pm$ 0.02a | 0.3 $\pm$ 0.02a   | 0.36 $\pm$ 0.02a | 0.32 $\pm$ 0.01 |
|                                                                       | Shade     | 0.4 $\pm$ 0.02a  | 0.4 $\pm$ 0.02a   | 0.43 $\pm$ 0.03a | 0.41 $\pm$ 0.01 |
|                                                                       | % change  | <b>28</b>        | <b>33</b>         | 19               | <b>27</b>       |
| C <sub>i</sub> /C <sub>a</sub> at LL                                  | Control   | 0.35 $\pm$ 0.02a | 0.26 $\pm$ 0.04a  | 0.37 $\pm$ 0.08a | 0.33 $\pm$ 0.02 |
|                                                                       | Shade     | 0.35 $\pm$ 0.04a | 0.24 $\pm$ 0.02a  | 0.44 $\pm$ 0.04a | 0.34 $\pm$ 0.02 |
|                                                                       | % change  | 0                | -7                | 19               | 4               |
| $\Delta_P$ (‰) at HL                                                  | Control   | 2.26 $\pm$ 0.17a | 2.58 $\pm$ 0.21a  | 2.91 $\pm$ 0.28a | 2.57 $\pm$ 0.13 |
|                                                                       | Shade     | 2.41 $\pm$ 0.17a | 3.15 $\pm$ 0.29a  | 3.63 $\pm$ 0.19a | 2.98 $\pm$ 0.17 |
|                                                                       | % change  | 7                | 22                | <b>25</b>        | 16              |
| $\Delta_P$ (‰) at LL                                                  | Control   | 2.7 $\pm$ 0.48a  | 4.17 $\pm$ 0.17a  | 4.66 $\pm$ 0.21a | 3.95 $\pm$ 0.23 |
|                                                                       | Shade     | 2.45 $\pm$ 0.3a  | 4.07 $\pm$ 0.35a  | 4.58 $\pm$ 0.15a | 3.69 $\pm$ 0.23 |
|                                                                       | % change  | -9               | -2                | -2               | -3              |
| Leakiness ( $\phi_i$ ) at HL                                          | Control   | 0.13 $\pm$ 0.01a | 0.17 $\pm$ 0.03a  | 0.21 $\pm$ 0.03a | 0.17 $\pm$ 0.01 |
|                                                                       | Shade     | 0.14 $\pm$ 0.01a | 0.23 $\pm$ 0.03ab | 0.29 $\pm$ 0.02b | 0.22 $\pm$ 0.02 |
|                                                                       | % change  | 9                | 34                | <b>39</b>        | <b>27</b>       |
| Leakiness ( $\phi_h$ ) at LL                                          | Control   | 0.19 $\pm$ 0.04a | 0.27 $\pm$ 0.03a  | 0.34 $\pm$ 0.02a | 0.27 $\pm$ 0.02 |
|                                                                       | Shade     | 0.14 $\pm$ 0.03a | 0.26 $\pm$ 0.06a  | 0.32 $\pm$ 0.01a | 0.24 $\pm$ 0.02 |
|                                                                       | % change  | -26              | -1                | -5               | -3              |
| Dry matter photosynthetic C-isotope discrimination, $\Delta_{DM}$ (‰) | Control   | 4.8 $\pm$ 0.1a   | 6.1 $\pm$ 0.3b    | 6.8 $\pm$ 0.2b   | 5.5 $\pm$ 0.2   |
|                                                                       | Shade     | 5.2 $\pm$ 0.2a   | 7.5 $\pm$ 0.3b    | 8.8 $\pm$ 0.2b   | 6.7 $\pm$ 0.3   |
|                                                                       | % change  | <b>9</b>         | <b>22</b>         | <b>30</b>        | <b>21</b>       |

**Table S4. Summary of biochemical parameters.**

Biochemical parameters of eight C<sub>4</sub> grasses grown at control or shade (16% of natural sunlight) environments. Values are means ± SE (*n* = 3-4). The ranking (from lowest = a) of subtypes within each single row using multiple-comparison Tukey's *post hoc* test. Values followed by the same letter are not significantly different at the 5% level. Significant percent changes are shown in bold (*p* < 0.05).

| Parameter                                                      | Treat    | NADP-ME              |                    |                   |                | PEP-CK            |                  | NAD-ME              |                 | Subtype       |            |            | Total C <sub>4</sub> |
|----------------------------------------------------------------|----------|----------------------|--------------------|-------------------|----------------|-------------------|------------------|---------------------|-----------------|---------------|------------|------------|----------------------|
|                                                                |          | <i>P. antidotale</i> | <i>C. ciliaris</i> | <i>S. bicolor</i> | <i>Z. mays</i> | <i>M. maximus</i> | <i>C. gayana</i> | <i>P. coloratum</i> | <i>L. fusca</i> | NADP-ME       | PEP-CK     | NAD-ME     |                      |
| Rubisco activity<br>( $\mu\text{mol m}^{-2}\text{s}^{-1}$ )    | Control  | 33±1a                | 31±1a              | 29±1a             | 31±2a          | 29±4a             | 36±4a            | 37±3a               | 29±1a           | 31±1a         | 32±3a      | 33±2a      | 32                   |
|                                                                | Shade    | 16±1ab               | 13±1a              | 16±2ab            | 21±2b          | 11±2a             | 23±2b            | 11±1a               | 15±1ab          | 16±1a         | 17±3a      | 13±1a      | 16                   |
|                                                                | % change | <b>-50</b>           | <b>-56</b>         | <b>-45</b>        | <b>-34</b>     | -63               | <b>-37</b>       | <b>-71</b>          | <b>-47</b>      | <b>-47</b>    | <b>-48</b> | <b>-60</b> | <b>-51</b>           |
| Rubisco sites<br>( $\mu\text{mol m}^{-2}$ )                    | Control  | 6.2±0.1a             | 5.1±0.2a           | 5±0.2a            | 5.7±0.3a       | 5.5±0.8a          | 6.3±0.8a         | 11±1b               | 6.7±0.2a        | 5.5±0.2a      | 5.8±0.5ab  | 8.5±1b     | 6.3±0.4              |
|                                                                | Shade    | 2.9±0.2ac            | 2.2±0.1a           | 3.1±0.4ac         | 3.8±0.4bc      | 2.5±0.2ab         | 4±0.4c           | 3.2±0.2ac           | 3.5±0.2ac       | 3±0.2a        | 3.2±0.4a   | 3.4±0.2a   | 3.1±0.1              |
|                                                                | % change | <b>-52</b>           | <b>-56</b>         | <b>-39</b>        | <b>-34</b>     | <b>-54</b>        | <b>-37</b>       | <b>-71</b>          | <b>-47</b>      | <b>-47</b>    | <b>-44</b> | <b>-61</b> | <b>-51</b>           |
| Rubisco<br>activation (%)                                      | Control  | 42±4a                | 41±6a              | 47±5ab            | 62±1ab         | 44±2ab            | 48±1ab           | 45±1ab              | 65±7b           | 47±3a         | 46±1a      | 55±5a      | 49±2                 |
|                                                                | Shade    | 32±6ab               | 83±5d              | 44±1bc            | 58±1cd         | 36±5ab            | 36±5ab           | 41±1bc              | 25±1a           | 54±6a         | 36±3a      | 33±4a      | 44±4                 |
|                                                                | % change | -24                  | <b>102</b>         | -6                | <b>-7</b>      | -20               | -25              | -8                  | <b>-62</b>      | 15            | <b>-22</b> | <b>-40</b> | -9                   |
| PEPC activity<br>( $\mu\text{mol m}^{-2}\text{s}^{-1}$ )       | Control  | 184±4d               | 128±6bc            | 274±13e           | 193±4d         | 169±22cd          | 160±16cd         | 94±12ab             | 51±11a          | 189±13b       | 165±13ab   | 69±12a     | 154±12               |
|                                                                | Shade    | 46±8bc               | 20±2a              | 77±8cd            | 98±6d          | 48±6bc            | 65±11cd          | 27±3ab              | 19±3a           | 59±9a         | 57±7a      | 23±3a      | 50±6                 |
|                                                                | % change | <b>-75</b>           | <b>-84</b>         | <b>-72</b>        | <b>-49</b>     | <b>-72</b>        | <b>-59</b>       | <b>-71</b>          | <b>-62</b>      | <b>-69</b>    | <b>-66</b> | <b>-66</b> | <b>-68</b>           |
| PEPC/Initial<br>Rubisco activity                               | Control  | 14±1.6c              | 10.9±1.9bc         | 20.1±1.8d         | 9.6±0.5bc      | 13.6±1cd          | 9.3±0.5ac        | 5.6±0.5ab           | 2.9±0.3a        | 13.7±1.3b     | 11.4±1.1at | 4.2±0.7a   | 11±1                 |
|                                                                | Shade    | 8.9±1.1ac            | 1.8±0.2a           | 11.8±1.4bc        | 8.2±0.5ac      | 14.2±3.8c         | 8.1±0.5ac        | 6±0.5ab             | 5±0.3ab         | 7.7±1.2a      | 11.2±2.2a  | 5.5±0.3a   | 8±0.9                |
|                                                                | % change | <b>-36.18</b>        | <b>-83.65</b>      | <b>-41.22</b>     | -14.7          | 4.84              | -13.15           | 7.45                | <b>73.32</b>    | <b>-43.93</b> | -2.48      | 29.79      | <b>-27.22</b>        |
| NADP-ME<br>activity<br>( $\mu\text{mol m}^{-2}\text{s}^{-1}$ ) | Control  | 57±2c                | 47±2b              | 50±2bc            | 49±3b          | 1±0a              | 1±0a             | 4±0a                | 3±1a            | 51±1b         | 1±0a       | 3±0a       | 28±5                 |
|                                                                | Shade    | 23±2b                | 25±1bc             | 33±1c             | 43±3d          | 0±0a              | 1±0a             | 1±0a                | 1±0a            | 31±2b         | 1±0a       | 1±0a       | 16±3                 |
|                                                                | % change | <b>-60</b>           | <b>-46</b>         | <b>-35</b>        | -13            | <b>-77</b>        | 2                | <b>-74</b>          | <b>-67</b>      | <b>-40</b>    | -43        | <b>-70</b> | <b>-100</b>          |
| NAD-ME<br>activity<br>( $\mu\text{mol m}^{-2}\text{s}^{-1}$ )  | Control  | 3±0a                 | 1±0a               | 2±0a              | 3±0a           | 3±1a              | 3±0a             | 35±1b               | 36±3b           | 2±0a          | 3±0a       | 35±2b      | 10±3                 |
|                                                                | Shade    | 1±0a                 | 1±0a               | 1±0a              | 2±0a           | 1±0a              | 2±0a             | 15±1b               | 18±1b           | 1±0a          | 1±0a       | 17±1b      | 5±1                  |
|                                                                | % change | <b>-56</b>           | -26                | -45               | -8             | -65               | -44              | <b>-57</b>          | <b>-49</b>      | <b>-38</b>    | <b>-56</b> | <b>-53</b> | -50                  |
| PEP-CK<br>activity<br>( $\mu\text{mol m}^{-2}\text{s}^{-1}$ )  | Control  | 6±1ab                | 16±1bc             | 2±0a              | 25±1c          | 46±3d             | 145±4e           | 20±3c               | 20±3c           | 11±3a         | 103±20b    | 20±2a      | 37±9                 |
|                                                                | Shade    | 3±1a                 | 5±1ab              | 0±0a              | 13±1b          | 22±2c             | 52±3d            | 9±0ab               | 5±0a            | 6±2a          | 35±6b      | 7±1a       | 14±3                 |
|                                                                | % change | <b>-45</b>           | <b>-68</b>         | <b>-78</b>        | <b>-47</b>     | <b>-52</b>        | <b>-64</b>       | -55                 | <b>-76</b>      | -50           | <b>-66</b> | <b>-66</b> | <b>-62</b>           |
| Protein (g m <sup>-2</sup> )                                   | Control  | 5.1±0.2ab            | 4.8±0.4ab          | 4.2±0.5ab         | 5.2±0.3ab      | 5.3±0.7ab         | 3.5±0.3a         | 5.8±0.5b            | 4.4±0.5ab       | 4.8±0.2a      | 4.4±0.5a   | 5±0.4a     | 4.8±0.2              |
|                                                                | Shade    | 2.3±0.4ab            | 1.7±0.1a           | 3.7±0.3b          | 3.3±0.1b       | 1.8±0.2a          | 2.5±0.3ab        | 2.2±0.1ab           | 2.8±0.5ab       | 2.8±0.3a      | 2.2±0.2a   | 2.5±0.3a   | 2.5±0.2              |
|                                                                | % change | <b>-54</b>           | <b>-64</b>         | -12               | <b>-37</b>     | <b>-67</b>        | -27              | <b>-62</b>          | <b>-37</b>      | <b>-42</b>    | <b>-51</b> | <b>-50</b> | <b>-47</b>           |

**Table S5. Definitions and units for variable described in the text.**

| Variable                       | Definition                                                                                                           | Values/Calculation/Units                                                                                                                                                                                                                  |
|--------------------------------|----------------------------------------------------------------------------------------------------------------------|-------------------------------------------------------------------------------------------------------------------------------------------------------------------------------------------------------------------------------------------|
| $A$                            | photosynthetic rate                                                                                                  | $\mu\text{mol m}^{-2} \text{s}^{-1}$                                                                                                                                                                                                      |
| $g_{\text{bs}}$                | bundle-sheath conductance to $\text{CO}_2$ (von Caemmerer, 2000)                                                     | $g_{\text{bs}} = 0.003 \text{ mol m}^{-2} \text{s}^{-1}$                                                                                                                                                                                  |
| $\phi_{\text{h}}$              | leakiness at high light (von Caemmerer et al., 2014)                                                                 | unitless                                                                                                                                                                                                                                  |
| $\phi_{\text{l}}$              | leakiness at low light (Ubierna et al., 2013)                                                                        | unitless                                                                                                                                                                                                                                  |
| $a_{\text{b}}$                 | $^{13}\text{C}$ fractionation across the boundary layer                                                              | 2.9 ‰                                                                                                                                                                                                                                     |
| $a$                            | $^{13}\text{C}$ fractionation due to diffusion of $\text{CO}_2$ in air                                               | 4.4 ‰                                                                                                                                                                                                                                     |
| $a'$                           | weighted fractionation across the boundary layer and stomata in series                                               | $a' = \frac{a_{\text{b}}(C_{\text{a}} - C_{\text{is}}) + a(C_{\text{is}} - C_{\text{i}})}{C_{\text{a}} - C_{\text{i}}}$                                                                                                                   |
| $a_{\text{i}}$                 | fractionation factor associated with the dissolution of $\text{CO}_2$ and diffusion through water                    | $a_{\text{i}} = s = 1.8 \text{ ‰}$                                                                                                                                                                                                        |
| $s$                            | fractionation during leakage of $\text{CO}_2$ out of the bundle-sheath cells (Henderson et al. 1992)                 | 1.8 ‰                                                                                                                                                                                                                                     |
| $f$                            | fractionation associated with photorespiration                                                                       | 11.6 ‰                                                                                                                                                                                                                                    |
| $t$                            | ternary effect of transpiration rate on the carbon isotope discrimination during $\text{CO}_2$ assimilation          | $t = \frac{(1+a') \cdot E}{2 \cdot g_{\text{ac}}^{\text{t}}} \text{ ‰}$                                                                                                                                                                   |
| $E$                            | leaf transpiration rate                                                                                              | $\text{mmol m}^{-2} \text{s}^{-1}$                                                                                                                                                                                                        |
| $g_{\text{ac}}^{\text{t}}$     | total conductance to $\text{CO}_2$ diffusion including boundary layer and stomatal conductance                       | $\text{mol m}^{-2} \text{s}^{-1}$                                                                                                                                                                                                         |
| $C_{\text{is}}$                | leaf surface $\text{CO}_2$ mole fraction                                                                             | $\mu\text{mol mol}^{-1}$                                                                                                                                                                                                                  |
| $b_3$                          | fractionation by Rubisco (Farquhar, 1983)                                                                            | 30 ‰                                                                                                                                                                                                                                      |
| $b_4$                          | combined fractionation of the conversion of $\text{CO}_2$ to $\text{HCO}_3^-$ and PEP carboxylation (Farquhar, 1983) | -5.74 ‰                                                                                                                                                                                                                                   |
| $e$                            | fractionation factor associated with respiration (Pengelly et al., 2010)                                             | $e = \delta^{13}\text{C}$ in the $\text{CO}_2$ cylinder – $\delta^{13}\text{C}$ in growth environment                                                                                                                                     |
| $g_{\text{m}}$                 | mesophyll conductance to $\text{CO}_2$ (Ubierna et al., 2016)                                                        | $g_{\text{m}} = 1.4 \text{ mol m}^{-2} \text{s}^{-1}$ at 28 °C                                                                                                                                                                            |
| $\Delta$                       | Photosynthetic discrimination against $^{13}\text{C}$                                                                | ‰                                                                                                                                                                                                                                         |
| $O_{\text{m}}$                 | $\text{O}_2$ mole fraction in the mesophyll cells                                                                    | 210000 $\mu\text{mol mol}^{-1}$                                                                                                                                                                                                           |
| $O_{\text{s}}$                 | $\text{O}_2$ mole fraction in the bundle-sheath cells                                                                | $O_{\text{s}} = \frac{\alpha \cdot A}{0.047 \cdot g_{\text{bs}}} + O_{\text{m}}$ $\mu\text{mol mol}^{-1}$                                                                                                                                 |
| $C_{\text{a}}$                 | $\text{CO}_2$ mole fraction in the ambient air                                                                       | Measured                                                                                                                                                                                                                                  |
| $C_{\text{s}}$                 | $\text{CO}_2$ mole fraction in the bundle-sheath cells                                                               | $C_{\text{s}} = \frac{(\Gamma^* \cdot O_{\text{s}}) \cdot \left( \frac{2}{3} \cdot (A + R_{\text{d}}) + \frac{(1-x) \cdot J_{\text{t}}}{3} \right)}{\frac{(1-x) \cdot J_{\text{t}}}{3} - (A + R_{\text{d}})}$ in $\mu\text{mol mol}^{-1}$ |
| $C_{\text{i}}$                 | $\text{CO}_2$ mole fraction inside the leaf                                                                          | $\mu\text{mol mol}^{-1}$                                                                                                                                                                                                                  |
| $C_{\text{m}}$                 | $\text{CO}_2$ mole fraction in the mesophyll cytosol at the sites of CA                                              | $C_{\text{m}} = C_{\text{i}} - \frac{A}{g_{\text{m}}}$ in $\mu\text{mol mol}^{-1}$                                                                                                                                                        |
| $R_{\text{d}}$                 | non-photorespiratory $\text{CO}_2$ released in the dark (= measured rates of dark respiration)                       | $\mu\text{mol m}^{-2} \text{s}^{-1}$                                                                                                                                                                                                      |
| $R_{\text{m}}$                 | Mesophyll mitochondrial respiration rate                                                                             | $R_{\text{m}} = 0.5 R_{\text{d}}$ in $\mu\text{mol m}^{-2} \text{s}^{-1}$                                                                                                                                                                 |
| $V_{\text{c}}$                 | Rubisco carboxylation rate (von Caemmerer, 2000)                                                                     | $V_{\text{c}} = \frac{(1-x) \cdot J_{\text{t}}}{3 \cdot \left( 1 + \frac{2 \cdot \Gamma^* \cdot O_{\text{s}}}{3 \cdot C_{\text{s}}} \right)}$ in $\mu\text{mol m}^{-2} \text{s}^{-1}$                                                     |
| $V_{\text{o}}$                 | Rubisco oxygenation rate (von Caemmerer, 2000)                                                                       | $V_{\text{o}} = \frac{V_{\text{c}} - A - R_{\text{d}}}{0.5}$ $\mu\text{mol m}^{-2} \text{s}^{-1}$                                                                                                                                         |
| $V_{\text{p}}$                 | PEP carboxylation rate (von Caemmerer, 2000)                                                                         | $V_{\text{p}} = \frac{x \cdot J_{\text{t}}}{2}$ $\mu\text{mol m}^{-2} \text{s}^{-1}$                                                                                                                                                      |
| $\alpha$                       | fraction of PSII activity in the bundle-sheath cells (Sharwood et al., 2016)                                         | 0 for NADP-ME and 0.2 for NAD-ME and PEP-CK species                                                                                                                                                                                       |
| $\gamma^*$                     | half of the reciprocal of Rubisco specificity (Sharwood et al., 2016)                                                | 0.000255, 0.00023 and 0.000233 for NADP-ME, NAD-ME and PEP-CK species, respectively                                                                                                                                                       |
| $\Gamma^*$ ( $\mu\text{bar}$ ) | compensation point in the absence of mitochondrial respiration                                                       | $\Gamma^* = O_{\text{s}} \cdot \gamma^*$                                                                                                                                                                                                  |
